1 Population connectivity predicts vulnerability to white-nose  
2 syndrome in the Chilean myotis (*Myotis chiloensis*) - a  
3 genomics approach

4  
5 Thomas M. Lilley, \*<sup>1</sup> Tiina M. Sävilammi TM, † Gonzalo Ossa, ‡§ Anna S Blomberg, † Anti  
6 Vasemägi, \*\* Veronica Yung, †† David L.J. Vendrami, ‡‡ Joseph S Johnson §§

7  
8 \* Finnish Museum of Natural History, University of Helsinki, Helsinki, Finland.

9 † Department of Biology, University of Turku, Turku, Finland.

10 ‡ ConserBat EIRL, San Fabian, Chile

11 § Programa para la Conservación de los Murciélagos de Chile, Santiago, Chile

12 \*\* Department of Aquatic Resources, Swedish University of Agricultural Sciences, Uppsala,  
13 Sweden

14 †† Sección Rabia, Subdepartamento de Enfermedades Virales, Instituto de Salud Pública,  
15 Santiago, Chile

16 ‡‡ Department of Animal Behavior, University of Bielefeld, Bielefeld, Germany

17 §§ Department of Biological Sciences, Ohio University, Athens, Ohio

18

19 Corresponding author: Thomas M. Lilley

20 ORCID:

21 Thomas M. Lilley: 0000-0001-5864-4958

22 Tiina M. Sävilammi: 0000-0001-9836-3843

23 Anna S. Blomberg: 0000-0002-6754-4948

24 David L.J. Vendrami: 0000-0001-9409-4084

25 Joseph S. Johnson: 0000-0003-2555-8142

26

27 Data availability

28 The RAD sequencing reads were deposited at NCBI SRA under BioProject ID PRJNA596389.

29

30 Running title: Population structure of *Myotis chiloensis*

31

32 Key words: Population genetics, population connectivity, population structure, chiroptera,  
33 disease spread.

34

35 <sup>1</sup>Finnish Museum of Natural History, P. Rautatiekatu 13, University of Helsinki, PL 17, 00014  
36 Helsinki, Finland

37 Phone: +358408337783

38 Email: [thomas.lilley@helsinki.fi](mailto:thomas.lilley@helsinki.fi)

39

40

## ABSTRACT

41 Despite its peculiar distribution, the biology of the southernmost bat species in the world,  
42 the Chilean myotis (*Myotis chiloensis*), has garnered little attention so far. The species has a  
43 north-south distribution of c. 2800 km, mostly on the eastern side of the Andes mountain  
44 range. Use of extended torpor occurs in the southernmost portion of the range, putting the  
45 species at risk of bat white-nose syndrome (WNS), a fungal disease responsible for massive  
46 population declines in North American bats. Here, we examined how geographic distance  
47 and topology would be reflected in the population structure of *M. chiloensis* along the  
48 majority of its range using a double digestion RAD-tag method. We sampled 66 individuals  
49 across the species range and discovered pronounced isolation-by-distance. Furthermore,  
50 and surprisingly, we found higher degrees of heterozygosity in the southernmost  
51 populations compared to the north. A coalescence analysis revealed that our populations  
52 may still not have reached secondary contact after the Last Glacial Maximum. As for the  
53 potential spread of pathogens, such as the fungus causing WNS, connectivity among  
54 populations was noticeably low, especially between the southern hibernatory populations in  
55 the Magallanes and Tierra del Fuego, and more northerly populations. This suggests the  
56 probability of geographic spread of the disease from the north through bat-to-bat contact to  
57 susceptible populations is low. The study presents a rare case of defined population  
58 structure in a bat species and warrants further research on the underlying factors  
59 contributing to this.

60 Key words: population structure, *Myotis*, Chiroptera, opportunistic pathogen, disease  
61 spread

62

63

## INTRODUCTION

64 Transmission of infectious diseases has garnered attention as one of the greatest risks to  
65 human, agriculture and wildlife health over the last decade (Cangelosi *et al.* 2004; Semenza  
66 and Menne 2009). Previous research demonstrates that the emergence of previously  
67 unknown diseases often results from a change in the ecology of the host, pathogen, and/or  
68 their environment (Scholthof 2007). An example of this is white-nose syndrome (hereafter  
69 WNS), an epizootic disease that emerged in North America in 2006 (Blehert *et al.* 2009). The  
70 disease is caused by the fungus, *Pseudogymnoascus destructans*, which infects insectivorous  
71 bats during the hibernation period at latitudes where prey are not widely available during  
72 winter (Lorch *et al.* 2011). Populations of highly susceptible species, especially from the  
73 genus *Myotis*, have declined by >90% in areas affected by WNS (Frick *et al.* 2010). The  
74 opportunistic pathogen can utilize alternative carbon sources (Raudabaugh and Miller 2013)  
75 and can persist in the cold, humid environment within hibernacula in the absence of bat  
76 hosts (Lorch *et al.* 2013; Hoyt *et al.* 2014).

77 *P. destructans* is native to Eurasia, where it has a large geographic range, with transmission  
78 to North America likely facilitated by humans (Warnecke *et al.* 2012; Leopardi *et al.* 2015).  
79 In North America, bats suffering from WNS were first detected in the state of New York  
80 during the winter of 2006–2007 (Frick *et al.* 2010). The fungus has since spread across North  
81 America, with records of prevalence in 33 U.S. states and 7 Canadian provinces. So far, *P.*  
82 *destructans* has been detected on 17 species of bats, with more species likely to follow.  
83 While human-assisted transmission of *P. destructans* likely has contributed to this spread,  
84 the ecology and behaviour of cave-hibernating bats in North America also makes them  
85 efficient vectors over large geographic areas (Wilder *et al.* 2015). Because WNS affects bats  
86 during extended bouts of torpor, at low temperatures where it is able to grow and infect the  
87 host, there has been speculation over how far into the southern North America the disease  
88 will spread (Verant *et al.* 2012; Meierhofer *et al.* 2019). Although bats inhabiting lower  
89 latitudes may suffer less from WNS, *P. destructans* conidia may be able to survive on the  
90 body of bats for several months, even at temperatures up to 37 °C (Campbell *et al.* 2019).  
91 This could facilitate the movement of WNS across Mesoamerica and the tropics, to arrive to



92 high southern latitudes where bats may be susceptible (Holz *et al.* 2019; Turbill and  
93 Welbergen 2019).

94 Of species known to harbour the WNS fungus, *Tadarida brasiliensis* is of particular interest.  
95 As a long-range migratory species, with movements spanning thousands of kilometres  
96 (Cockrum 1969; Glass 1982), *T. brasiliensis* may be an important vector for spreading *P.*  
97 *destructans* into the southern hemisphere (Ommundsen *et al.* 2017; McCracken *et al.* 2018).  
98 Ecological niche models predict suitable habitat for the proliferation of *P. destructans* in  
99 South America, highlighting the need to understand vectors such as *T. brasiliensis* as well as  
100 human transmission (Escobar *et al.* 2014). However, once *P. destructans* arrives in South  
101 America, its spread will not necessarily resemble that seen in North America, as it is likely to  
102 be influenced by differing geology and species ecology.

103 The Chilean myotis (*Myotis chiloensis* [Waterhouse, 1840]) is the most Southerly distributed  
104 species of bat in the world, together with the southern big-eared brown bat (*Histiotus*  
105 *magellanicus*, Koopman 1967; Gardner 2007). *Myotis chiloensis* has a vast north-south  
106 distribution that includes forested areas on both sides of the Andes from the northern shore  
107 of Navarino Island to the southern border of the Atacama desert in Chile (Ossa and  
108 Rodriguez-San Pedro 2015). The range of *M. chiloensis* overlaps with the distribution of *T.*  
109 *brasiliensis* from the north, where *M. chiloensis* is not believed to hibernate, to 45°S  
110 latitude, where *M. chiloensis* possibly hibernate and may therefore be susceptible to WNS  
111 (Bozinovic *et al.* 1985). However, there is no information available on the population  
112 structure of *M. chiloensis*, precluding an understanding of how *P. destructans* could be  
113 transported from the northern edge of its range to more southern, and vulnerable,  
114 populations. The connectedness of individuals across the range will determine the speed  
115 and intensity of potential spread. Population structuring in bats is often relatively low  
116 because of their efficient mode of dispersal, flight (Laine *et al.* 2013). An ability to disperse  
117 more efficiently results in decreased population differentiation (Bohonak 1999) to the  
118 extent that some bat species are panmictic across their range (Burland and Wilmer 2001;  
119 Laine *et al.* 2013). Such high dispersal would likely result in rapid spread of *P. destructans*.  
120 However, bats in the genus *Myotis* show instances of pronounced population structure that  
121 may hinder spread of the fungus. For instance, the Gibraltar Strait, which separates the

122 Iberian Peninsula from the Maghreb in Morocco by a minimum gap of 14 km of the open  
123 sea, represents a barrier for gene flow for *M. myotis* (Castella *et al.* 2000). Chile is littered  
124 with such potential barriers to gene flow, such as the Atacama Desert, glaciers, ice fields,  
125 the Andes Mountains, and the Magellan Strait, which in turn can hinder the potential spread  
126 of *P. destructans*. Furthermore, populations may still be affected by the Last Glacial  
127 Maximum, which covered a large part of Patagonia under ice until c. 10000 years bp (Sérsic  
128 *et al.* 2011; Mansilla *et al.* 2018).

129 With tourism in southern Chile expected to increase (e.g. . [http://www.conaf.cl/parques-](http://www.conaf.cl/parques-nacionales/visitanos/estadisticas-de-visitacion/)  
130 [nacionales/visitanos/estadisticas-de-visitacion/](http://www.conaf.cl/parques-nacionales/visitanos/estadisticas-de-visitacion/)), and migratory species such as *T.*  
131 *brasiliensis* capable of carrying spores across large distances, there is a serious need to  
132 better understand the population structure of Patagonian bat species before WNS spreads  
133 to the region. The lack of knowledge on the extent of migration and mixing, and life history  
134 traits in general, means that research in this area is now urgent and essential (Ossa and  
135 Rodriguez-San Pedro 2015; Ossa 2016; Ossa *et al.* 2019). Studying population ecology  
136 through molecular genetic methods allows for the identification of more accurate  
137 population boundaries, which is important when assessing conservation in response to  
138 threats of disease and dramatic declines in population size (Moritz 1994). This study will  
139 therefore aim to describe population structure and isolation-by-distance in *M. chiloensis*  
140 across the range of the species. By studying *M. chiloensis* along 2400 km of latitudinal  
141 gradient using genome-wide SNP markers, we aimed to test if geography and the Last  
142 Glacial Maximum influence genetic isolation patterns.

## 143 MATERIALS AND METHODS

### 144 Sample collection and DNA extraction

145 To describe population genetic structure in *M. chiloensis*, we obtained wing tissue samples  
146 of 66 bats from two sources. A portion were obtained from live bats captured in the field  
147 during November and December 2017 (i.e. austral spring) from two localities: Chicauma,  
148 Metropolitana region (33 °S 70 °W) and Karukinka Reserve, Tierra del Fuego (64 °S 78 °W)  
149 respectively (Capture permit: 4924\_2017, Figure 1 A, Table S1). We used disposable biopsy  
150 punches (5 mm, MLT3335, Miltex Instrument Co, Plainsboro, New Jersey) to collect tissue

151 samples from the plagiopatagium of captured, live bats. The sampled bats were released at  
152 the capture site. Additional samples were obtained from dead bats submitted to the Public  
153 Health Institute of Chile for rabies testing (Figure 1 A, Table S1). Submitted bats included  
154 latitude and longitude locations of origin. Tissue samples from the bats submitted for rabies  
155 testing were obtained from the plagiopatium using sterile scalpels. To determine if *P.*  
156 *destructans* had already spread to Chile, we swabbed the nose and wings of all bats in the  
157 field and at the Public Health Institute of Chile bat with a sterile polyester swab (Puritan 25-  
158 806 1PD, Guildford ME, USA) and stored at -20 °C until analysis.

159 We divided samples into four groups according to their geographic origin, with sub-locations  
160 within each group to assist in further analyses. Sampling locations are presented in Figure 1  
161 A and details of populations and samples are provided in Table 1 and Table S1. Tissue  
162 samples were stored in 1.5 ml tubes with 95% EtOH and stored at -20 °C until further  
163 analysis. Fungal spore samples were stored in 1.5 ml tubes and stored at -20 °C until further  
164 analysis. We extracted DNA from tissue samples using QIAmp DNA Mini Kits (Qiagen, Hilden  
165 Germany) and stored DNA at -80 °C. DNA from fungal swabs was extracted using Qlamp  
166 DNA Micro Kits (Qiagen, Hilden Germany).

167 The amount of DNA in the final solution of each sample was tested and quantified using the  
168 Thermo Scientific Nanodrop spectrophotometer, giving a result for the amount of DNA in  
169 ng/ µL. Samples were frozen between DNA extraction and analysis.

170 Identification and quantification of *P. destructans*

171 Quantification of *P. destructans* load by qPCR was completed as described previously in  
172 Johnson et al. (2015) with the exception of using 1 µl sample in the reaction, Roche Fast  
173 Start Essential DNA Probe Master, and a Roche Lightcycler 480 instead of a BioRad iCycler.

174 RAD sequencing

175 We sequenced 66 individuals in total. Duplicate samples from 30 individuals were  
176 additionally sequenced to estimate repeatability and error rate of the called genotypes.  
177 DNA was prepared for genotyping-by-sequencing using a double digestion RAD-tag method  
178 as described in Elshire et al. (2011). PstI-BamHI-digested libraries were prepared by the

179 Center of Evolutionary Applications (University of Turku; see Lemopoulos et al. 2017 and  
180 references therein for further details) and sequenced in an Illumina HiSeq2500 run (100 bp  
181 single end reads and pooling 96 samples on each lane) at Finnish Functional Genomics  
182 Centre (Turku Bioscience).

183 Yield comparison samples

184 As the amount of DNA available may often be very limited in experiments where preserved  
185 samples from the rabies laboratory are utilized, we wanted to estimate the effect of initial  
186 DNA concentration to the resulting read coverage. We compared the total read coverages  
187 of the replicate samples with Pearson's correlation.

188 The resulting fastq reads, separated by barcode for each sample, were quality-controlled  
189 and low-quality bases trimmed with `condetri v. 2.3` with parameter `minlen=30` (min. length  
190 of a trimmed read) followed by `adapter-trim` with `cutadapt` for Illumina universal adapters  
191 from the end of the reads (identified with FastQC quality control in some of the samples).  
192 Then, reads were mapped against *M. lucifugus* genome (`mluc_2.0_assembly_supers.fasta`)  
193 using `bwa mem` with parameters `-B 3 -O 5 -k 15`. After mapping back with `BWA mem`, we  
194 used `SAMtools v. 1.4` and the associated `bcftools` for calling genotypes for SNPs and for  
195 filtering SNPs based on minimum of 40% of the samples genotyped, at least eight  
196 alternative alleles detected and SNP quality  $\geq 20$  (`bcftools` filter). We further filtered the  
197 SNPs based on exactly two alleles detected and excluded SNPs with particularly low ( $\leq 5$ ) or  
198 unusually high ( $\geq 125$ ) mean coverage based on visual inspection of the mean coverage  
199 distribution.

200 Population genetic analysis

201 For the final SNP dataset, which only included unduplicated samples, we performed  
202 principal component analysis implemented in `prcomp` function of R stats package, and  
203 calculated Euclidean genetic coordinates for each individual from PC1 and PC2. The four  
204 pre-determined ancestral populations based on the sampling regions of each individual  
205 were confirmed by hierarchical clustering of the Euclidean distanced calculated from PC1  
206 and PC2. Individuals clustering to a neighbouring population were assumed to have  
207 dispersed from their natal populations and were reassigned for the later analysis. We

208 further investigated the relative contributions of the ancestral populations inhabiting  
209 regions 1-4 in the present-day nucleotide using ADMIXTURE (Zhou et al. 2009) analysis for  
210 the A-samples, run with four expected populations (parameter  $K=4$ ) based on prior  
211 knowledge of the population structure, and with quasi-Newton convergence acceleration  
212 method. We were particularly interested in identifying possible hybrid individuals.

213 After assigning each individual to the final regions, we calculated Nei's pairwise  $F_{ST}$  using  
214 HierFStat v. 0.04-22 pairwise.  $F_{ST}$  function for A-samples for SNP's with no missing values.  
215 To assess the significance of genetic differentiation, we compared the actual obtained  $F_{ST}$   
216 estimates to the null distributions of  $F_{ST}$  values under panmixia, obtained from a hundred  
217 random permutations of alleles. Latitude and longitude coordinates of the sampling  
218 locations were used to calculate pairwise geographic distances between individuals in  
219 kilometres using Haversine method assuming a spherical earth, implemented in function  
220 `dism` in the R package `geodist` v. 1.5-10.

221 We estimated Isolation-by-distance with two methods: A Mantel test with complete  
222 permutations and a linear model *geographic distance* ~ *genetic distance*. We used pairwise  
223  $F_{ST}$  as a measure for the genetic distances and mean of between-individual distances as  
224 geographic coordinates for populations inhabiting each of the four regions. To study the  
225 population structure in more detail, we repeated the Isolation-by-distance analysis for the  
226 genetic vs. geographic distances from the most extreme individual (sample ID 700) using a  
227 Mantel test with all possible permutations, and a linear model to identify individuals with  
228 unusually high or low genetic differentiation. We then studied the systematic differentiation  
229 of the individuals sampled in different regions by assessing the differences of the residual  
230 distributions of each of the four populations from zero using t-tests and Bonferroni-  
231 correction of the  $P$ -values.

232 We also calculated mean observed heterozygosity within the variable loci in Hardy-  
233 Weinberg equilibrium ( $FDR \geq 0.05$ ) in each of the four study regions and compared the  
234 observed values to the mean expected heterozygosities using inbreeding coefficient  $F_i$ ,  
235 calculated as the difference between expected and observed heterozygosity divided by  
236 expected heterozygosity (Serre 2006). The 95% confidence intervals for the heterozygosity  
237 estimates were found by randomly sampling the variable loci for 1,000 times and extracting

238 the distributions of bootstrap means. The deviations of  $F$  statistics from zero were detected  
239 using single-sample Wilcoxon tests. The significances of the regional differences in the  
240 observed and expected heterozygosity distributions, and in the  $F$  statistics, were tested both  
241 by inspecting the overlaps in the bootstrapped confidence intervals and using analysis of  
242 variance and Tukey's post hoc tests. The significances of within-region differences between  
243 the expected and observed heterozygosity were tested both by comparing the  
244 bootstrapped confidence intervals and by pairwise t-tests and Bonferroni-corrected p-  
245 values. Finally, the fraction of SNPs unique to any one region, and the number of SNPs  
246 shared between all regions, were calculated from the observations of variable and non-  
247 variable loci within regions.

#### 248 Demographic modeling

249 To formally test whether any of the studied populations experienced secondary contact  
250 following glaciation, we implemented a demographic analysis using the software  
251 *fastsimcoal2* (Excoffier *et al.* 2013) in combination with the folded site frequency spectra  
252 (SFS) calculated from our data using *easySFS.py* utility (available from  
253 <https://github.com/isaacovercast/easySFS>). Specifically, we evaluated support for two  
254 alternative models (Supplementary Figure S6). The first model, representing our null  
255 hypothesis of no secondary contact among populations, specified four distinct lineages  
256 (region 1, region 2, region 3 and region 4) corresponding to the populations inhabiting the  
257 four geographic regions sampled in the present study. These diverged from each other at  
258 the time points T1, T2 and T3 as presented in Figure S6a, and exchanged no migrants.  
259 Region 1 was used as the lineage from which the other three populations emerged, as this is  
260 thought to be the population which is closest to the ancestral *Myotis chiloensis* population.  
261 The second model, representing our alternative hypothesis of secondary contact among  
262 populations, was identical with the exception that symmetric migration was present  
263 between population pairs region 1- region 2 and region 3- region 4, and asymmetric  
264 migration was implemented from region 2 to region 3 (Supplementary Figure S6b). In  
265 addition to identify the model that was best supported by our data, we also estimated  
266 divergence times (T1, T2 and T3) and effective population sizes (region 1, region 2, region 3

267 and region 4) for the four modeled lineages, as well as migration rates (Mig12, Mig21,  
268 Mig34, Mig43 and Mig32).

269 We performed 50 independent *fastsimcoal2* runs for each model, with 100,000 simulations  
270 and 40 cycles of the likelihood maximization algorithm. We then calculated Akaike's  
271 Information Criteria (AIC) from the *fastsimcoal2* runs which yielded the highest maximum  
272 likelihood for each model and used these values for model comparison. Finally, we  
273 extracted parameter estimates from the best run of the most supported model and  
274 calculated 95% confidence intervals based on 100 parametric bootstrap replicates, as  
275 described in Excoffier et al. (2013).

276 Data availability

277 The RAD sequencing reads were deposited at NCBI SRA under BioProject ID PRJNA596389.

## 278 RESULTS

279 Filtering

280 Ninety-one of the 96 samples (66 individuals and 30 duplicates) had reads matched with a  
281 barcode. Of the obtained genotypes, 54846 were biallelic and used in the later analysis,  
282 while we excluded 88882 non-variable (homozygous to alternative) variants and 1708  
283 variants with more than 2 alleles. After filtering, the mean SNP coverage ranged from 0.5 to  
284 257.0 (Supplementary Figure S1). We excluded tags with  $< 5$  or  $> 125$  mean coverage,  
285 leaving 47079 tags. The average rate of missing SNPs among the final unique samples was  
286 6.2%, ranging from 0 to 24%.

287 Replicate samples

288 The correlation between input DNA concentration and the resulting mean per-sample read  
289 coverage was only moderate ( $\text{cor} = 0.3394$ ,  $t_{61} = 2.8178$ ,  $P = 0.0065$ , Supplementary Figure  
290 S2 A, Supplementary Figure 3 A-B). In contrast, we found strong and negative association  
291 between mean read coverage after sequence assembly and the number of missing genotype  
292 calls ( $\text{cor} = -0.9763$ ,  $t_{61} = -35.223$ ,  $P < 2.2e-16$ , Figure S2 B). Furthermore, read coverages  
293 were very similar between the technical replicate samples ( $\text{cor} = 0.8736$ ,  $t_{26} = 9.1542$ ,  $P =$

294 1.292e-09, Supplementary figure S2 C), allowing us to omit “B” samples (replicated). The  
295 removal of the biological replicates was conducted to minimise the possible SNP calling bias  
296 induced by some samples having approximately twice the amount of sequence data  
297 compared to the others, if replicate samples had been combined. Identical genotype calls  
298 ranged from 85.6% to 96.9% with an average of 94.2% identical genotype calls  
299 (Supplementary figure S3 C), depending heavily on read coverage ( $cor = 0.9275$ ,  $t_{26} = 12.641$ ,  
300  $P = 1.312e-12$  and  $cor = 0.8484$ ,  $t_{26} = 8.1716$ ,  $P = 1.186e-08$  in “A” and “B” samples,  
301 respectively; Supplementary figure 2 E-F). Although the correlation between the initial DNA  
302 concentration and identical genotype calls between biological replicates was significant ( $cor$   
303  $= 0.5990$ ,  $t_{26} = 3.814$ ,  $P = 0.0007579$ ; Supplementary figure S2 D), this seemed to mainly be  
304 due to two outlier observations with both very low concentration and repeatability.

#### 305 Identification and quantification of *P. destructans*

306 Besides our control samples, no samples showed signs of amplification a portion of the  
307 multicopy intergenic spacer region of the rRNA gene complex of *P. destructans* by 38 cycles,  
308 which is generally considered as a cut-off for the presence of the pathogen DNA in the  
309 samples (Muller *et al.* 2013). Therefore, we can conclude that the *M. chilensis* individuals  
310 sampled in this study did not carry *P. destructans*.

#### 311 Population genetic analysis

312 Principal component analysis on 66 individuals and 5538 SNPs without any missing values  
313 from non-duplicated samples (label including A, Figure 1 B) revealed a clear structuring of  
314 individuals according to the sampling location indicative of strong population structure.  
315 Based on hierarchical clustering of the two most important principal components  
316 (Supplementary Figure 4), we confirmed the four pre-determined populations based on the  
317 natural hierarchical structuring of the data. Based on the clustering, the sub-population  
318 assignment of one individual, sample number 679, changed from Biobio to Maule (which  
319 was the most common region assignment among the three nearest neighbors for that  
320 individual). The estimation of ancestry of each sampled individual by examining the relative  
321 contributions of ancestral populations inhabiting regions 1-4 in the present-day revealed



322 particularly pure ancestral lines in the northern and southern parts of the range, with  
323 hybridization occurring in the central part of the range (Figure 2.).

324 Pairwise  $F_{ST}$ -value estimates between the populations sampled from the four geographical  
325 locations ranged from 0.04 (between regions 2 and 3) to 0.113 (between the most distant  
326 regions 1 and 4, Table 2). All estimated  $F_{ST}$  values were found significantly larger ( $P < 0.01$ )  
327 than the permuted  $F_{ST}$  distributions, with the 95 % confidence intervals of the null  
328 distributions between 0 and 0.0205. Both the Mantel test approach and linear modelling  
329 between genetic distances (Euclidean distances calculated from PC1 and PC2) and  
330 geographical distances (latitude/longitude coordinates converted to distances in kilometres)  
331 strongly suggested that we reject the null hypothesis of geographic and genetic distances  
332 being unrelated. For the between-population comparisons with  $F_{ST}$ , we calculated Mantel  
333 statistic  $r = 0.9497$  ( $P = 0.041667$ ) and R-squared estimate of 0.8773 (DF = 1,4,  $t = 6.063$ ,  $P =$   
334 0.00374) (Supplementary figure 5. Also, for the between-individual distances, the observed  
335 Mantel statistic  $r = 0.944$  ( $P = 0.001$ ), and R-squared estimate 0.943 (DF = 1,61;  $t = 31.994$ ;  $P$   
336  $< 2e-16$ ) from the linear modelling suggesting that genetic and geographic distances are  
337 strongly positively associated (Figure 3). More detailed exploration of the between-  
338 individual linear model revealed, that the distribution of the residuals in regions 1 (DF = 20,  $t$   
339  $= -3.0679$ , Bonferroni  $P = 0.024284$ ) and 4 (DF = 11,  $t = -10.523$ , Bonferroni  $P = 1.7724e-06$ )  
340 were marginally smaller than 0, while the residuals of individuals in regions 2 (DF = 15;  $t =$   
341 3.5896; adj. Bonferroni  $P = 0.002682$ ) and 3 (DF = 13,  $t = 5.9325$ , Bonferroni  $P = 0.0001986$ )  
342 were significantly larger than 0 (Figure 3).

343 Of the total of 47079 SNPs, 43903 were found to be in Hardy-Weinberg equilibrium.  
344 Analyses of variance revealed statistically significant differences between populations in  
345 observed heterozygosities [ $F(3,106450)=760.6$ ,  $P < 2e-16$ ], in expected heterozygosities  
346 [ $F(3,106450)=871.4$ ,  $P < 2e-16$ ], and in the F statistics [ $F(3,106450)=55.29$ ,  $P < 2e-16$ ]. Both  
347 based on confidence intervals and pairwise comparisons, observed and expected  
348 heterozygosity distributions were consistently higher (non-overlapping 95% confidence  
349 intervals and adjusted  $P < 0.05$ ) in the southern regions than in north, except for the two  
350 northernmost regions (region 1 vs. region 2), where a statistically significant difference was  
351 not observed (Table 1, Table S2). Similarly, observed heterozygosities were consistently

352 lower than those estimated from allele frequencies (non-overlapping 95% confidence  
353 intervals and adjusted  $P < 0.05$ ), which may be caused by within-region population structure  
354 (Table 1, Table S2). Finally, pairwise comparisons of the inbreeding coefficient distributions  
355 indicated that the excess of homozygotes was greater in the north than in the south when  
356 compared to neutral expectation based on allele frequencies. This was supported with  
357 statistically significant differences (non-overlapping confidence intervals and adjusted  
358  $P < 0.05$ ) observed in all comparisons except in region pairs 2 and 3; and 4 and 5 (Table 1,  
359 Table S2). This indicated that the northern populations are inbreeding more than the  
360 southern populations (Table 1, Table S2).

361 A large proportion of SNPs, 25.3%, were polymorphic in all four regions. The fraction of  
362 SNPs unique only to one region decreased from going north to south: while 8.6% of the  
363 SNPs were unique to region 1, only 2.5% unique SNPs were found in region 4.

364 We did not find support for secondary contact using demographic modelling with  
365 Fastsimcoal2. Instead, the null model that included no migration among populations (Figure  
366 S6a) received the highest AIC support (Table S3). Parameter priors and estimates, together  
367 with their 95% confidence intervals, from the best model are reported in Table S4.

## 368 DISCUSSION

369 Our results present the first assessment of population structure in the widely distributed bat  
370 species, *M. chiloensis*, using individual-based approach with genome-wide markers. We  
371 found that geographic distance within the range of the species are reflected in its  
372 population structure. Although we found a clear and robust population structure among  
373 sampling sites, population structure is correlated with geographical distance, even though  
374 populations are separated by ice fields, mountain ranges and stretches of open water. This  
375 has implications for the protection of populations that may be susceptible to WNS. Our  
376 results also show highest genetic variability in the species is at the southern extent of its  
377 range.

378 Strong population structure is rarely seen in bats, even across large geographical scales in  
379 genera such as *Myotis*, with shorter dispersal distances (Castella *et al.* 2000; Atterby *et al.*  
380 2010; Laine *et al.* 2013). In fact, geographical distance often correlates significantly with

381 genetic distance in bats. This is partially due to autumn migration and swarming behaviour  
382 in *Myotis* species, which brings together bats from broad geographic areas to breed and  
383 promote recombination (Burns *et al.* 2014; Burns and Broders 2015). Furthermore, powered  
384 flight allows effective dispersal, which is often male biased (Arnold 2007; Angell *et al.* 2013).  
385 This is reflected in low fixation indices in widespread bat species, such as *M. daubentonii*,  
386 where individuals separated by thousands of kilometres in Europe show low fixation indexes  
387 (Laine *et al.* 2013). While fixation indices cannot be compared directly across species,  
388 especially when different methodological approaches are used, they do give an indication of  
389 the connectivity of populations.

390 Although geographic and genetic distances were found to have a strong positive correlation  
391 in our study, we can concur that the southernmost population shows a higher degree of  
392 isolation compared to the geographic distance to its closest comparative population to the  
393 north. An  $F_{ST}$  of 0.075 between regions 3 and 4 using whole-genome data is already higher  
394 than  $F_{ST}$  values recorded for *M. daubentonii* across Europe using microsatellites (Laine *et al.*  
395 2013), and in our data, the geographic distance is only c. 1000 km. Our data, with tens of  
396 thousands of SNP's also allowed a more precise estimate of fixation compared to a handful  
397 of microsatellites. However, due to a limited number of individuals, it did not allow us to  
398 examine dispersal as a function of sex, which in bats is often a male driven function (Arnold  
399 2007; Laine *et al.* 2013; Angell *et al.* 2013). Our sampling may also have missed some  
400 connecting populations in between regions 3 and 4, which could for instance be located on  
401 the eastern slopes of the Andes. However, our test for relative contributions of ancestral  
402 populations reveals bats in region 4, in the Magallanes and Tierra del Fuego, have no mixing  
403 of ancestral populations with the other regions.

404 In the northern hemisphere, approximately 18000 years ago, at the end of the Late  
405 Pleistocene, the ice sheets began to recede as the global climate became warmer. The biota  
406 migrated northwards following their optimal environments (Huntley and Webb 1989). This  
407 expansion of refugial populations has been associated with genetic variation decreasing  
408 south-to-north in some species: a trend attributed to a series of bottlenecks when the biota  
409 spread from the leading edge of the refugial population, leading to a loss of alleles and  
410 decreasing genetic diversity (Hewitt 1996, 1999). Contrary to what one could expect based

411 on these latitudinal shifts in diversity in the northern latitude, genetic diversity in *M.*  
412 *chiloensis* appears to increase with increasing latitude, from north to south. We presumed  
413 this counterintuitive pattern of heterozygosity within the species may be related to the  
414 glaciation history of South America, where populations isolated by glacial events could have  
415 been able to hybridize. For instance, in some terrestrial European and Scandinavian  
416 vertebrates, the intraspecific genealogical lineages, which formed in separate refugia, were  
417 found to have come to secondary contact in the Fennoscandian area (Tegelström 1987;  
418 Jaarola and Tegelström 1995; Nesbø *et al.* 1999; Knopp and Merilä 2009).

419 *Myotis chiloensis* is described as a vicariant species with respect to other closely related  
420 *Myotis* species (*M. albescens*, *M. nigricans*, *M. levis*) from South America, Ruedi *et al.* (2013)  
421 estimated this isolation event at 5.5 My in late Miocene. This same time period saw the  
422 beginning of a number of glaciations events in Patagonia with variable intensity and  
423 duration (Rabassa *et al.* 2011). Glacial episodes isolated the Patagonian forest from around  
424 middle Miocene well into the late Quaternary, the Last Glacial Maximum (Rabassa *et al.*  
425 2011, Supplemental Figure S7). During the glaciations, the forests on the Pacific coast were  
426 most like completely suppressed, possibly with isolated small refugia. On the Atlantic side,  
427 the forest was fragmented from 36°S southwards (Sérsic *et al.* 2011). Finally, in Tierra del  
428 Fuego the forest was probably displaced towards the current submarine shelf (Ponce *et al.*  
429 2011). As the ice retreated refugial populations may have come into secondary contact in  
430 the southern part of current range, which could explain the high heterozygosity as well as  
431 the small fraction of unique SNP's of these populations. However, our coalescence analysis  
432 rejected the secondary contact model, favouring the null model suggesting our study  
433 populations are still largely separated after the Last Glacial Maximum. Indeed, the  $F_{ST}$  -  
434 values are high, suggesting isolation of the populations. By contrast, our analysis for the  
435 relative contributions of ancestral populations suggests mixing of populations. One potential  
436 explanation for this apparent discrepancy is that we derived Site Frequency Spectrum from  
437 a rather small number of individuals, which may carry a signal of migration that is not strong  
438 enough to allow a model that includes secondary contact to be favoured over a simpler  
439 model without migration.

440 The spread of *P. destructans* via one host to another was very rapid in North America  
441 (Blehert *et al.* 2009; Frick *et al.* 2010). This was facilitated in part by the ecology of North  
442 American cave-hibernating bats and the availability of suitable environment for the fungus  
443 to propagate: limestone caves found throughout the Appalachian region in eastern North  
444 America (Lorch *et al.* 2013). Furthermore, as a consequence of down-regulation of  
445 metabolism during extended torpor bouts, attempted immune responses fall short, and  
446 may even contribute to mortality in hosts infected with *P. destructans* (Field *et al.* 2015;  
447 Lilley *et al.* 2017, 2019). In addition to these, the massive population declines associated  
448 with WNS in affected species (Turner *et al.* 2011) were magnified by the panmictic  
449 population structure across eastern North America in the most affected species, *M.*  
450 *lucifugus* (Miller-Butterworth *et al.* 2014; Vonhof *et al.* 2015).

451 Our results for *M. chiloensis* from austral South America suggest the southernmost  
452 population in region 4, may be less likely to be infected via their continental conspecifics,  
453 because of reduced contact between the populations. Our results indicated no mixing of  
454 ancestry in the southernmost individuals in our study, suggesting the *M. chiloensis* on Tierra  
455 del Fuego are isolated from their mainland counterparts. To our knowledge, this is also the  
456 only population to use extended torpor, a prerequisite for the propagation of *P. destructans*  
457 and the onset of WNS (Ossa *et al.* Submitted for publication). Tierra del Fuego, the southern  
458 tip of Patagonia and the continent of South America, experiences extended low winter  
459 temperatures comparable to areas in North America where WNS is manifested. Our genetic  
460 analysis for the presence of *P. destructans* on the sampled bats suggests the fungal  
461 pathogen does not exist within the distribution range of our focal species at present. Even if  
462 the fungus were to enter the region, variability in host behavior and environmental  
463 characteristics may be the primary factors protecting hosts from the pathology related to  
464 WNS (Zukal *et al.* 2014, 2016). Most strikingly large cave hibernacula with suitable, stable  
465 environmental conditions favouring the environmental persistence of the pathogen in the  
466 absence of the hosts, are very scarce and separated by hundreds of kilometers in most of  
467 the southern range of *M. chiloensis*.

468 The observed distribution of *M. chiloensis* is vast, covering a range of forested habitats from  
469 arid Sclerophyllous to sub-Antarctic (Ossa and Rodriguez-San Pedro 2015). In this respect,

470 taking into consideration our results on clear population segregation begs to propose the  
471 question on the species status of *M. chiloensis* as a whole. Indeed, *M. chiloensis* also  
472 appears to vary phenotypically along its distribution range (Mann 1978; Ossa 2016). It has  
473 been proposed that the species was composed of three sub-species: *M. ch. atacamensis*  
474 which is presently known as *M. atacamensis*; *M. ch. arescens* from 29°S to 39°S; and *M. ch.*  
475 *chiloensis* from 39°S to 53°S (Mann 1978). That classification was due according to their coat  
476 colour changes in relation to exposure to solar radiation and ambient temperature, which is  
477 correlated to latitude (Budyko 1969) and levels of precipitation in their habitat. They vary  
478 from a lighter pelage to a dark brown colour on a gradient from the northern part of their  
479 range to the south (Galaz *et al.* 2006). This promotes the theory, isolation by adaptation, as  
480 a driver of population genetic structure. The genetic adaptations of an individual to their  
481 local environment separates populations and leads to a reduced gene flow (Orsini *et al.*  
482 2013). However, the isolation by adaptation theory negates the fact that there is a  
483 possibility of a barrier so that gene flow is inhibited by climate or adaptations to the local  
484 environment. It is possible to therefore state that isolation-by-dispersal limitation, and  
485 moreover isolation-by- distance, are the more probable causes of the observed results in  
486 the present study. Indeed, the reluctance of the species to cross barriers, for instance the  
487 Andes, can clearly be seen by examining population 3, where six individuals sampled from  
488 Puerto Aysén (437, 442, 443, 167, 256, 260) are visibly isolated on the PCA plot from  
489 individuals on the other side of the Andes, under 150 km away. This also depicts the fine  
490 scale resolution our individual-based SNP-based approach allows. However, further studies  
491 should focus deeper on the taxon status of different population of the species currently  
492 recognized as *M. chiloensis*.

493 The results highlight the importance to assess the population structure which may limit the  
494 spread of white-nose syndrome disease. Whether *P. destructans* or another epizootic in the  
495 future could spread depends largely on the population structure and connectedness of  
496 hosts (Lilley *et al.* 2018).

#### 497 ACKNOWLEDGEMENTS

498 We thank the Rufford Foundation (Rufford Small Grant 10502-1 and 23042-2), H2020 Marie  
499 Skłodowska-Curie Actions (706196), and Ohio University Research Council for funding the

500 work. We thank Servicio Agrícola y ganadero Diproren for the capture permits in Tierra del  
501 Fuego (Res Ex: 1253/2016 and 4924/2017), Juan Carlos Aravena from the Instituto de la  
502 Patagonia for his help, the personnel from WCS Chile for allowing us to conduct research at  
503 Karukinka Natural Reserve as well as for their help with field work. We thank Michelle  
504 Lineros and Tania Gatica from the National Health Institute for their help to obtain the  
505 tissue samples. We thank Austin Waag for assistance with field work.

## 506 REFERENCES

507 Angell, R. L., R. K. Butlin, and J. D. Altringham, 2013 Sexual segregation and flexible mating  
508 patterns in temperate bats. Plos One 8:.

509 Arnold, B. D., 2007 Population structure and sex-biased dispersal in the forest dwelling  
510 vespertilionid bat, *Myotis septentrionalis*. Am. Midl. Nat. 157: 374–384.

511 Atterby, H., J. Aegerter, G. Smith, C. Conyers, T. Allnutt *et al.*, 2010 Population genetic  
512 structure of the Daubenton's bat ( *Myotis daubentonii* ) in western Europe and the  
513 associated occurrence of rabies. Eur. J. Wildl. Res. 56: 67–81.

514 Blehert, D. S., A. C. Hicks, M. Behr, C. U. Meteyer, B. M. Berlowski-Zier *et al.*, 2009 Bat white-  
515 nose syndrome: an emerging fungal pathogen? Science 323: 227–227.

516 Bohonak, A. J., 1999 Dispersal, gene flow, and population structure. Q. Rev. Biol. 74: 21–45.

517 Bozinovic, F., L. Contreras, M. Rosenmann, and J. Torres-Mura, 1985 Bioenergetics of *Myotis*  
518 *chiloensis* (Quiroptera: Vespertilionidae). Rev Chil Hist Nat 58: 39–45.

519 Budyko, M. I., 1969 The effect of solar radiation variations on the climate of the Earth. Tellus  
520 21: 611–619.

- 521 Burland, T. M., and J. W. Wilmer, 2001 Seeing in the dark: molecular approaches to the  
522 study of bat populations. *Biol. Rev.* 76: 389–409.
- 523 Burns, L. E., and H. G. Broders, 2015 Who swarms with whom? Group dynamics of *Myotis*  
524 bats during autumn swarming. *Behav. Ecol.* 26: 866–876.
- 525 Burns, L. E., T. R. Frasier, and H. G. Broders, 2014 Genetic connectivity among swarming  
526 sites in the wide ranging and recently declining little brown bat (*Myotis lucifugus*).  
527 *Ecol. Evol.* 4: 4130–4149.
- 528 Campbell, L. J., D. P. Walsh, D. S. Blehert, and J. M. Lorch, 2019 Long-term survival of  
529 *Pseudogymnoascus destructans* at elevated temperatures. *J. Wildl. Dis.*
- 530 Cangelosi, G., N. Freitag, and M. Riley-Buckley, 2004 From outside to inside: environmental  
531 microorganisms as human pathogens. *American Society of Microbiology*.
- 532 Castella, V., M. Ruedi, L. Excoffier, C. Ibanez, R. Arlettaz *et al.*, 2000 Is the Gibraltar Strait a  
533 barrier to gene flow for the bat *Myotis myotis* (Chiroptera: Vespertilionidae)? *Mol.*  
534 *Ecol.* 9: 1761–1772.
- 535 Cockrum, E., 1969 Migration in the guano bat, *Tadarida brasiliensis*. *Misc Publ Mus Nat Hist*  
536 *Univ Kans.* 51: 303–336.
- 537 Elshire, R. J., J. C. Glaubitz, Q. Sun, J. A. Poland, K. Kawamoto *et al.*, 2011 A robust, simple  
538 genotyping-by-sequencing (GBS) approach for high diversity species (L. Orban, Ed.).  
539 *PLoS ONE* 6: e19379.
- 540 Escobar, L. E., A. Lira-Noriega, G. Medina-Vogel, and A. T. Peterson, 2014 Potential for  
541 spread of the white-nose fungus (*Pseudogymnoascus destructans*) in the Americas:



542 use of Maxent and NicheA to assure strict model transference. *Geospatial Health*  
543 221–229.

544 Excoffier, L., I. Dupanloup, E. Huerta-Sánchez, V. C. Sousa, and M. Foll, 2013 Robust  
545 Demographic Inference from Genomic and SNP Data. *PLOS Genet.* 9: e1003905.

546 Field, K. A., J. Johnson, T. Lilley, S. Reeder, E. Rogers *et al.*, 2015 The white-nose syndrome  
547 transcriptome: activation of anti-fungal host responses in wing tissue of hibernating  
548 bats. *Plos Pathog.* 11: e1005168.

549 Frick, W. F., J. F. Pollock, A. C. Hicks, K. E. Langwig, D. S. Reynolds *et al.*, 2010 An emerging  
550 disease causes regional population collapse of a common North American bat  
551 species. *Science* 329: 679–682.

552 Galaz, J., J. Yañez, A. Gantz, and D. Martínez, 2006 Orden Chiroptera. Pp. 67–89 in  
553 Mamíferos de Chile (A. Muñoz-Pedreros and J.Yañez, eds.), in *Mamíferos de Chile*,  
554 Centro de Estudios Agrarios y Ambientales, Valdivia, Chile.

555 Gardner, A. (ed. ), 2007 *Mammals of South America, Volume 1*. University of Chicago Press,  
556 Chicago, Illinois.

557 Glass, B. P., 1982 Seasonal movements of Mexican freetail bats *Tadarida brasiliensis*  
558 *mexicana* banded in the Great Plains. *Southwest. Nat.* 27: 127–133.

559 Hewitt, G. M., 1999 Post-glacial re-colonization of European biota. *Biol. J. Linn. Soc.* 68: 87–  
560 112.

561 Hewitt, G. M., 1996 Some genetic consequences of ice ages, and their role in divergence and  
562 speciation. *Biol. J. Linn. Soc.* 58: 247–276.

- 563 Holz, P., J. Hufschmid, W. Boardman, P. Cassey, S. Firestone *et al.*, 2019 Does the fungus  
564 causing white-nose syndrome pose a significant risk to Australian bats? *Wildl. Res.*  
565 46: 657–668.
- 566 Hoyt, J. R., K. E. Langwig, J. Okoniewski, W. F. Frick, W. B. Stone *et al.*, 2014 Long-term  
567 persistence of *Pseudogymnoascus destructans*, the causative agent of white-nose  
568 syndrome, in the absence of bats. *EcoHealth*.
- 569 Huntley, B., and T. Webb, 1989 Migration: species' response to climatic variations caused by  
570 changes in the earth's orbit. *J. Biogeogr.* 5–19.
- 571 Jaarola, M., and H. Tegelström, 1995 Colonization history of north European field voles  
572 (*Microtus agrestis*) revealed by mitochondrial DNA. *Mol. Ecol.* 4: 299–310.
- 573 Johnson, J. S., D. M. Reeder, T. M. Lilley, G. Á. Czirják, C. C. Voigt *et al.*, 2015 Antibodies to  
574 *Pseudogymnoascus destructans* are not sufficient for protection against white-nose  
575 syndrome. *Ecol. Evol.* 2203–2214.
- 576 Knopp, T., and J. Merilä, 2009 The postglacial recolonization of Northern Europe by *Rana*  
577 *arvalis* as revealed by microsatellite and mitochondrial DNA analyses. *Heredity* 102:  
578 174–181.
- 579 Koopman, K., 1967 The southernmost bats. *J. Mammal.* 48: 487–488.
- 580 Laine, V. N., T. M. Lilley, K. Norrdahl, and C. R. Primmer, 2013 Population genetics of  
581 Daubenton's bat (*Myotis daubentonii*) in the Archipelago Sea, SW Finland. *Ann. Zool.*  
582 *Fenn.* 50: 303–315.

- 583 Lemopoulos, A., S. Uusi-Heikkilä, A. Vasemägi, A. Huusko, H. Kokko *et al.*, 2017 Genome-  
584 wide divergence patterns support fine-scaled genetic structuring associated with  
585 migration tendency in brown trout. *Can. J. Fish. Aquat. Sci.* 75: 1680–1692.
- 586 Leopardi, S., D. Blake, and S. J. Puechmaille, 2015 White-nose syndrome fungus introduced  
587 from Europe to North America. *Curr. Biol.* 25: R217–R219.
- 588 Lilley, T., J. Anttila, and L. Ruokolainen, 2018 Landscape structure and ecology influence the  
589 spread of a bat fungal disease. *Funct. Ecol.* 32: 2483–2496.
- 590 Lilley, T. M., J. M. Prokkola, A. S. Blomberg, S. Paterson, J. S. Johnson *et al.*, 2019 Resistance  
591 is futile: RNA-sequencing reveals differing responses to bat fungal pathogen in  
592 Nearctic *Myotis lucifugus* and Palearctic *Myotis myotis*. *Oecologia*.
- 593 Lilley, T. M., J. M. Prokkola, J. S. Johnson, E. J. Rogers, S. Gronsky *et al.*, 2017 Immune  
594 responses in hibernating little brown myotis (*Myotis lucifugus*) with white-nose  
595 syndrome. *Proc R Soc B* 284: 20162232.
- 596 Lorch, J. M., C. U. Meteyer, M. J. Behr, J. G. Boyles, P. M. Cryan *et al.*, 2011 Experimental  
597 infection of bats with *Geomyces destructans* causes white-nose syndrome. *Nature*  
598 480: 376-U129.
- 599 Lorch, J. M., L. K. Muller, R. E. Russell, M. O'Connor, D. L. Lindner *et al.*, 2013 Distribution  
600 and environmental persistence of the causative agent of white-nose syndrome,  
601 *Geomyces destructans*, in bat hibernacula of the Eastern United States. *Appl.*  
602 *Environ. Microbiol.* 79: 1293–1301.
- 603 Mann, G., 1978 Los pequeños mamíferos de Chile. *Gayana Concepc.* 40: 1–342.

- 604 Mansilla, C. A., R. D. McCulloch, and F. Morello, 2018 The vulnerability of the *Nothofagus*  
605 forest-steppe ecotone to climate change: Palaeoecological evidence from Tierra del  
606 Fuego (~53°S). *Palaeogeogr. Palaeoclimatol. Palaeoecol.* 508: 59–70.
- 607 McCracken, G. F., R. F. Bernard, M. Gamba-Rios, R. Wolfe, J. J. Krauel *et al.*, 2018 Rapid  
608 range expansion of the Brazilian free-tailed bat in the southeastern United States,  
609 2008–2016. *J. Mammal.* 99: 312–320.
- 610 Meierhofer, M. B., J. S. Johnson, S. J. Leivers, B. L. Pierce, J. E. Evans *et al.*, 2019 Winter  
611 habitats of bats in Texas. *PLOS ONE* 14: e0220839.
- 612 Miller-Butterworth, C. M., M. J. Vonhof, J. Rosenstern, G. G. Turner, and A. L. Russell, 2014  
613 Genetic structure of little brown bats (*Myotis lucifugus*) corresponds with spread of  
614 white-nose syndrome among hibernacula. *J. Hered.* esu012.
- 615 Moritz, C., 1994 Defining ‘Evolutionarily Significant Units’ for conservation. *Trends Ecol.*  
616 *Evol.* 9: 373–375.
- 617 Muller, L. K., J. M. Lorch, D. L. Lindner, M. O’Connor, A. Gargas *et al.*, 2013 Bat white-nose  
618 syndrome: a real-time TaqMan polymerase chain reaction test targeting the  
619 intergenic spacer region of *Geomyces destructans*. *Mycologia* 105: 253–259.
- 620 Nesbø, C. L., T. Fosshem, L. A. Vøllestad, and K. S. Jakobsen, 1999 Genetic divergence and  
621 phylogeographic relationships among European perch (*Perca fluviatilis*) populations  
622 reflect glacial refugia and postglacial colonization. *Mol. Ecol.* 8: 1387–1404.
- 623 Ommundsen, P., C. Lausen, and L. Matthias, 2017 First acoustic records of the Brazilian free-  
624 tailed bat (*Tadarida brasiliensis*) in British Columbia. *Northwest. Nat.* 98: 132–136.

- 625 Orsini, L., J. Vanoverbeke, I. Swillen, J. Mergeay, and L. De Meester, 2013 Drivers of  
626 population genetic differentiation in the wild: isolation by dispersal limitation,  
627 isolation by adaptation and isolation by colonization. *Mol. Ecol.* 22: 5983–5999.
- 628 Ossa, G., 2016 Primer registro de la especie *Myotis chiloensis*, (Waterhouse, 1838)  
629 (Chiroptera, Vespertilionidae) en el Parque Nacional Alberto de Agostini (Región de  
630 Magallanes y Antártica Chilena). *An. Inst. Patagon.* 44: 85–88.
- 631 Ossa, G., J. S. Johnson, A. I. E. Puisto, V. Rinne, I. E. Sääksjärvi *et al.*, 2019 The Klingon  
632 batbugs: Morphological adaptations in the primitive bat bugs, *Bucimex chilensis* and  
633 *Primicimex cavernis*, including updated phylogeny of Cimicidae. *Ecol. Evol.* 9: 1736–  
634 1749.
- 635 Ossa, G., T. M. Lilley, A. G. Waag, M. Meierhofer, and J. Johnson, Submitted for publication  
636 Roosting ecology of the southernmost tree-dwelling bats, *Myotis chiloensis* and  
637 *Histiotus magellanicus*, in southern Tierra del Fuego.
- 638 Ossa, G., and Rodriguez-San Pedro, 2015 *Myotis chiloensis* (Chiroptera: Vespertilionidae).  
639 *Mammal Species* 47: 51–56.
- 640 Ponce, J. F., J. Rabassa, A. Coronato, and A. M. Borrromei, 2011 Palaeogeographical evolution  
641 of the Atlantic coast of Pampa and Patagonia from the last glacial maximum to the  
642 Middle Holocene. *Biol. J. Linn. Soc.* 103: 363–379.
- 643 Rabassa, J., A. Coronato, and O. Martínez, 2011 Late Cenozoic glaciations in Patagonia and  
644 Tierra del Fuego: an updated review. *Biol. J. Linn. Soc.* 103: 316–335.

- 645 Raudabaugh, D. B., and A. N. Miller, 2013 Nutritional capability of and substrate suitability  
646 for *Pseudogymnoascus destructans*, the causal agent of wat white-nose syndrome.  
647 PLoS ONE 8: e78300.
- 648 Ruedi, M., B. Stadelmann, Y. Gager, E. J. P. Douzery, C. M. Francis *et al.*, 2013 Molecular  
649 phylogenetic reconstructions identify East Asia as the cradle for the evolution of the  
650 cosmopolitan genus *Myotis* (Mammalia, Chiroptera). Mol. Phylogenet. Evol. 69: 437–  
651 449.
- 652 Scholthof, K.-B. G., 2007 The disease triangle: pathogens, the environment and society. Nat.  
653 Rev. Microbiol. 5: 152–156.
- 654 Semenza, J. C., and B. Menne, 2009 Climate change and infectious diseases in Europe.  
655 Lancet Infect. Dis. 9: 365–375.
- 656 Serre, J., 2006 *Génétique des populations*. Dunod, Paris.
- 657 Sérsic, A. N., A. Cosacov, A. A. Cocucci, L. A. Johnson, R. Pozner *et al.*, 2011 Emerging  
658 phylogeographical patterns of plants and terrestrial vertebrates from Patagonia.  
659 Biol. J. Linn. Soc. 103: 475–494.
- 660 Tegelström, H., 1987 Transfer of mitochondrial DNA from the northern red-backed vole  
661 (*Clethrionomys rutilus*) to the bank vole (*C. glareolus*). J. Mol. Evol. 24: 218–227.
- 662 Turbill, C., and J. A. Welbergen, 2019 Anticipating white-nose syndrome in the Southern  
663 Hemisphere: Widespread conditions favourable to *Pseudogymnoascus destructans*  
664 pose a serious risk to Australia’s bat fauna. Austral Ecol. 45: 89–96.

665 Turner, G. G., D. M. Reeder, and J. T. H. Coleman, 2011 A five-year assessment of mortality  
666 and geographic spread of white-nose syndrome in North American bats and a look to  
667 the future. *Bat Res. News* 52: 13–27.

668 Verant, M. L., J. G. Boyles, W. Waldrep, G. Wibbelt, and D. S. Blehert, 2012 Temperature-  
669 dependent growth of *Geomyces destructans*, the fungus that causes bat white-nose  
670 syndrome. *Plos One* 7: e46280.

671 Vonhof, M. J., A. L. Russell, and C. M. Miller-Butterworth, 2015 Range-wide genetic analysis  
672 of little brown bat (*Myotis lucifugus*) populations: estimating the risk of spread of  
673 White-nose syndrome. *PLoS ONE* 10: e0128713.

674 Warnecke, L., J. M. Turner, T. K. Bollinger, J. M. Lorch, V. Misra *et al.*, 2012 Inoculation of  
675 bats with European *Geomyces destructans* supports the novel pathogen hypothesis  
676 for the origin of white-nose syndrome. *Proc. Natl. Acad. Sci. U. S. A.* 109: 6999–7003.

677 Wilder, A. P., T. H. Kunz, and M. D. Sorenson, 2015 Population genetic structure of a  
678 common host predicts the spread of white-nose syndrome, an emerging infectious  
679 disease in bats. *Mol. Ecol.* 24: 5495–5506.

680 Zupal, J., H. Bandouchova, T. Bartonicka, H. Berkova, V. Brack *et al.*, 2014 White-nose  
681 syndrome fungus: a generalist pathogen of hibernating bats. *Plos One* 9: e97224.

682 Zupal, J., H. Bandouchova, J. Brichta, A. Cmokova, K. S. Jaron *et al.*, 2016 White-nose  
683 syndrome without borders: *Pseudogymnoascus destructans* infection tolerated in  
684 Europe and Palearctic Asia but not in North America. *Sci. Rep.* 6: 19829.

685

686 Figure captions:

687 Figure 1. Sampling locations and groupings for genetic sampling of *Myotis chiloensis* in Chile  
688 (A). The two most important principal components calculated from allele frequencies  
689 explain 15.8% of the total nucleotide variation (B).

690 Figure 2. Biogeographical ancestry (admixture) analysis based on nucleotide polymorphisms.  
691 Each vertical bar represents an individual, ordered by latitude. Red, green, blue and purple  
692 colours indicate the relative genetic contributions of ancestral populations inhabiting  
693 regions 1-4, respectively.

694 Fig. 3. The correlation between geographic and genetic distances between individuals.  
695 Geographic distances are measured in kilometres, and genetic distances as Euclidean  
696 principal component distances from the reference individual (sample 700). Dashed lines  
697 represent 95% confidence interval for the linear model. The violin plot highlights the  
698 differences between model residuals for each study region. Residual distributions that differ  
699 significantly from zero after Bonferroni correction for multiple testing are marked with \* ( $P$   
700  $< 0.05$ ) and \*\*\* ( $P < 0.0001$ ).

701



| Numeric region | Number of individuals (A) | Number of duplicates (B) | male / female | Mean observed heterozygosity (95% confidence interval) | Mean expected heterozygosity (95% confidence interval) | Inbreeding coefficient <i>F</i> | Unique SNPs |
|----------------|---------------------------|--------------------------|---------------|--------------------------------------------------------|--------------------------------------------------------|---------------------------------|-------------|
| 1              | 20                        | 6                        | 16/4          | 0.2550<br>(0.2530-0.2570)                              | 0.2793<br>(0.2777-0.2809)                              | 0.0868<br>(0.0813 - 0.0925)     | 8.6%        |
| 2              | 19                        | 6                        | 9/10          | 0.2536<br>(0.2514-0.2557)                              | 0.2765<br>(0.2749-0.2780)                              | 0.08286<br>(0.0773- 0.0891)     | 4.4%        |
| 3              | 14                        | 9                        | 7/7           | 0.2872<br>(0.2848-0.2896)                              | 0.2993<br>(0.29762-0.3009)                             | 0.0404<br>(0.0343 – 0.0463)     | 3.6%        |
| 4              | 13                        | 9                        | 5/8           | 0.3248<br>(0.3221-0.3275)                              | 0.3335<br>(0.3316-0.3352)                              | 0.0261<br>(0.0197 – 0.0326)     | 2.5%        |
| <b>tot.</b>    | <b>66</b>                 | <b>30</b>                |               |                                                        |                                                        |                                 |             |

**Table 1.** Individuals and samples per region.

**$F_{ST}$  and mean geographic distance (km)**

|          | Region 4             | Region 3             | Region 2             | Region 1      |
|----------|----------------------|----------------------|----------------------|---------------|
| Region 4 |                      | <i>970.9</i>         | <i>1550.3</i>        | <i>2266.9</i> |
| Region 3 | 0.075 <sup>***</sup> |                      | <i>588.7</i>         | <i>1326.6</i> |
| Region 2 | 0.089 <sup>***</sup> | 0.041 <sup>***</sup> |                      | <i>757.0</i>  |
| Region 1 | 0.113 <sup>***</sup> | 0.072 <sup>***</sup> | 0.040 <sup>***</sup> |               |

**Table 2.** Nei's pairwise  $F_{ST}$  and geographic distances (in italics) between populations inhabiting the four geographic regions. The significance level ( $P < 0.01$ ) of the  $F_{ST}$  statistics is denoted with \*\*\*.

A

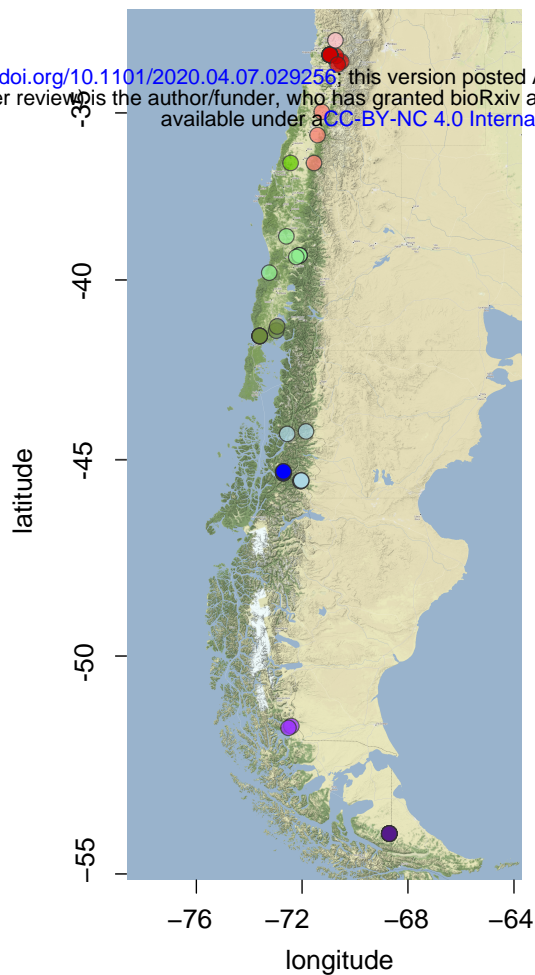

B

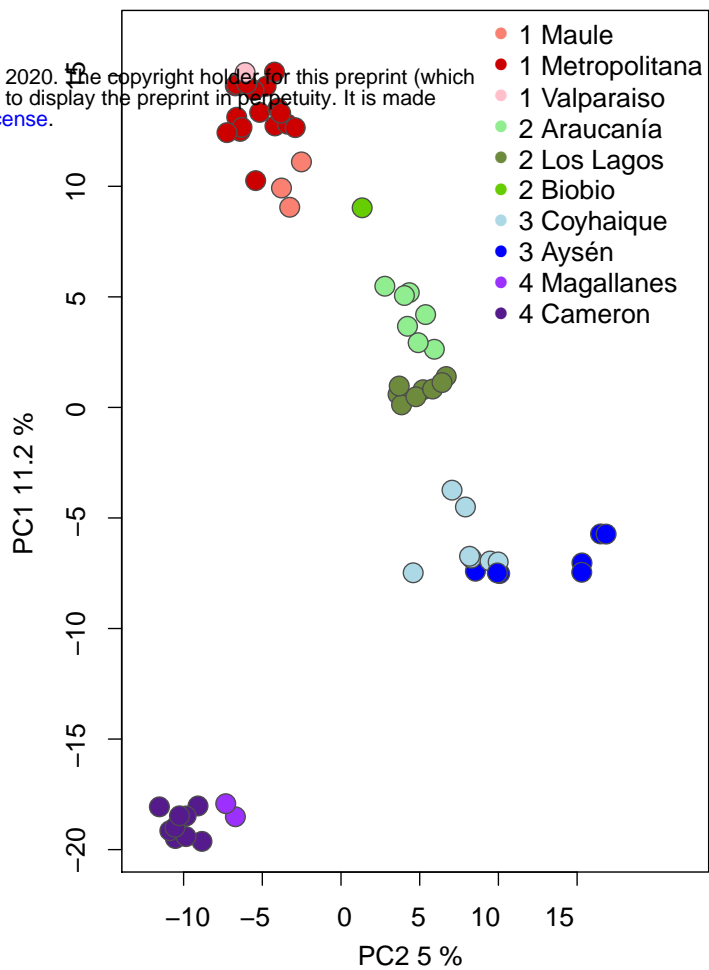

<https://doi.org/10.1101/2020.04.07.029256>; this version posted April 23, 2020. The copyright holder for this preprint (which was not certified by peer review) is the author/funder, who has granted bioRxiv a license to display the preprint in perpetuity. It is made available under aCC-BY-NC 4.0 International license.

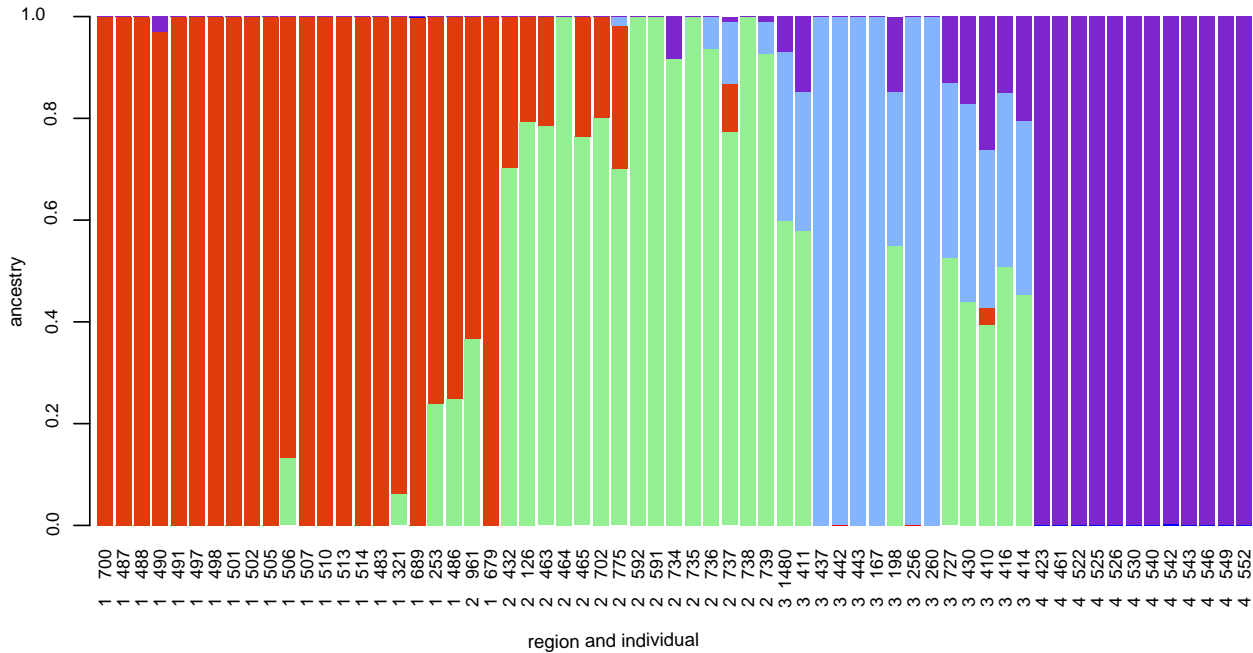

geographic distance (kilometers) from ind. 700

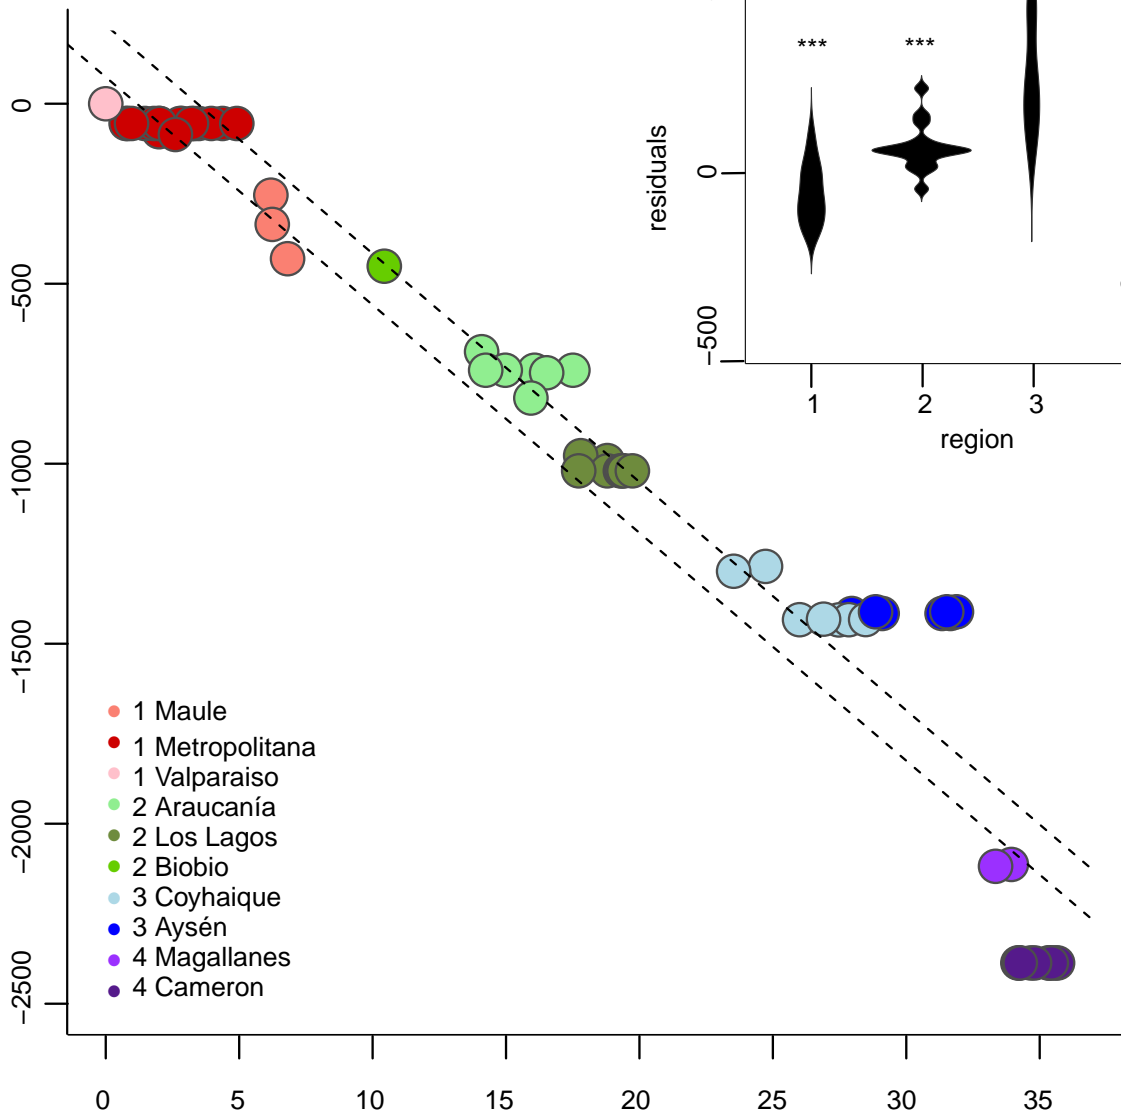

residuals

region
